# Supplementary material for: Radiotherapy in Leptomeningeal Disease: A Systematic Review of Randomized and Non-randomized Trials
Source: PubMed Central journal article supplement (PMC6872542; doi:10.3389/fonc.2019.01224), 2019-11-15
Supplement: Data_Sheet_1.pdf [file Data_Sheet_1.pdf]

*Appendix 1: Search Strategy: MEDLINE (Ovid)*

- 1 *MENINGEAL CARCINOMATOSIS/*
- 2 *MENINGEAL NEOPLASMS/sc*
- 3 *(leptomeningeal adj3 disease\*).ti,kf.*
- 4 *(leptomenin\* adj3 (carcinoma\* or metastas\*)).ti,kf.*
- 5 *(neoplastic adj3 meningiti\*).ti,kf.*
- 6 *(meningeal\* adj3 (metastas\* or carcinoma\*)).ti,kf.*
- 7 *(leptomening\* adj3 disseminat\*).ti,kf.*
- 8 *((leptomeningeal adj3 disease\*) or (leptomenin\* adj3 (carcinoma\* or metastas\*)) or (neoplastic adj3 meningiti\*) or (leptomening\* adj3 disseminat\*) or (meningeal\* adj3 (metastas\* or carcinoma\*))).ab.*
- 9 *or/1-8 [LMD terms]*
- 10 *MENINGEAL CARCINOMATOSIS/rt*
- 11 *MENINGEAL NEOPLASMS/rt*
- 12 *exp RADIOTHERAPY/*
- 13 *RADIATION/*
- 14 *(radiotherap\* or radio-therap\*).ti,kf.*
- 15 *(radiat\* or irradiat\* or reirradiat\* or re-irradiat\*).ti,kf.*
- 16 *(radiosurg\* or radio-surg\*).ti,kf.*
- 17 *(chemoradiotherap\* or chemo-radiotherap\* or radioimmunotherap\* or radio-immunotherap\*).ti,kf.*
- 18 *WBRT.ti,kf.*
- 19 *(((leptomeningeal adj3 disease\*) or LMD or (leptomenin\* adj3 (carcinoma\* or metastas\*)) or (neoplastic adj3 meningiti\*) or (leptomening\* adj3 disseminat\*) or (meningeal\* adj3 (metastas\* or carcinoma\*))) and (radiotherap\* or radio-therap\* or radiat\* or irradiat\* or reirradiat\* or re-irradiat\* or radiosurg\* or radio-surg\* or chemoradiotherap\* or chemo-radiotherap\* or radioimmunotherap\* or radio-immunotherap\*)).ab. [terms in abstract]*
- 20 *or/10-19*
- 21 *9 and 20*
- 22 *exp TREATMENT OUTCOME/*
- 23 *SURVIVAL/*
- 24 *exp SURVIVAL ANALYSIS/*
- 25 *SURVIVAL RATE/*
- 26 *Kaplan-Meier.ab.*
- 27 *(surviv\* or mortalit\* or outcome\* or prognos\*).ti,kf.*

28 *((leptomeningeal adj3 disease\*) or (leptomenin\* adj3 (carcinomatos\* or metastas\*)) or (neoplastic adj3 meningiti\*) or (leptomening\* adj3 disseminat\*) or (meningeal\* adj3 (metastas\* or carcinoma\*))) and (surviv\* or mortalit\* or outcome\* or prognos\*).ab.*

29 *or/22-28*

30 *21 and 29 [LMD + RT + survival/outcome]*

31 *(animals not (human and animals)).sh.*

32 *30 not 31*

33 *limit 32 to english language*

34 *case reports.pt. or "case report".ti.*

35 *review.pt. or review.ti.*

36 *34 not 35 [case reports not part of a review]*

37 *33 and 36 [case reports]*

38 *33 not 37 [publications other than case reports]*
